# Supplementary material
Source: Elsevier journal article supplement (https://www.sciencedirect.com/science/article/pii/S0300289619304089)
Supplement: mmc1 [file S0300289619304089:mmc1.docx]

Online Content:

Table 2: Summary of 36 case reports previously published in literature.

| **Case No** | **Author, Year** | **Age(years)/ Sex / Occupation** | **Method of Simulating Hemoptysis** |
| --- | --- | --- | --- |
| 1 | Chapman1, 1957 | 39/M | ? Self-inflicted wounds |
| 2 | Barke2,1962 | 43/M | Injury to posterior pharynx with a piece of glass |
| 3 | Bowie et al3. 1965 | 47/M | Dicumarol self-administration |
| 4 | Trew et al4. 1970 | 27/F | ?Dicumarol self-administration |
| 5 | Carroll et al5. 1975 | 43/M | Unclear |
| 6 | Roethe et al6. 1981 | 34/F | Self-inflicted wounds to posterior part of toungue |
| 7 | Roethe et al6. 1981 | 26/F | Venisection |
| 8 | Roethe et al6. 1981 | 21/F | Trauma to trachea with cotton swab |
| 9 | Bush et al7. 1982 | 25/M | Unclear |
| 10 | Feinsilver8 1983 | 30/F | Unclear |
| 11 | Raj et al9. 1985 | 27/F | Manipulation of pharyngeal muscles |
| 12 | Mitchell et al10. 1985 | 22/F | Venisection |
| 13 | Humphries11 1988 | 27/F | Biting the inside of lip |
| 14 | Ifudu et al12. 1992 | 30/M | Unclear |
| 15 | Duffy13 1992 | 33/M | Unclear |
| 16 | Rusakow14 et al 1993 | 19/F | Mixture of Iodine solution and shampoo |
| 17 | Baktari15 et al. 1994 | 36/M | Unclear |
| 18 | Okimoto16 1994 | 21/M | Venisection |
| 19 | Ozden17 1999 | 17/F | Venisection |
| 20 | Saed et al18. 1999 | 22/F | Unclear |
| 21 | Gürkan19 et al | 17/F | Unclear |
| 22 | Bjornson20 2001 | 12/F | Nose Picking |
| 23 | Highland21 2002 | 25/M | Unclear |
| 24 | Santo Andrade et al22. 2005 | 23/M | Venisection |
| 25 | Kokturk et al23. 2006 | 26/F | Unclear |
| 26 | Young et al24. 2008 | 15/M | Venisection |
| 27 | Altınkaynak et al25. 2009 | 12/F | Trauma to the inside of lip by pin |
| 28 | Tolga et al26. 2012 (2 cases) | 1.1/M  8 months/F | Monther sneaks blood samples of another patient and places in mouth.  Mother was injuring the child with her finger and making her bleed. |
| 29 | Guzin et al27. 2012 (5 cases) | Median age  15 (10-16.5)/ 1M/4F | Bitched lesions on the buccal mucosa, Cherry Juice, 3 patients unclear |
| 30 | Alshimemeri et al28. 2013 (2 cases) | 22/F  20/M | Unclear,  Sucking on the finger he had punctured |
| 31 | Smith et al29. 2013 | 30/F | Venisection |
| 32 | Uzuner et al30. 2013 | 10/F | Biting of buccal mucosa |
| 33 | Mucha et al31. 2014 | 61/M | Venisection |
| 34 | Altıntaş et al32. 2016 | 27/F | Trauma to the oral mucosa |
| 35 | Demirtas et al33. 2017 | 15/F | Irritating the patient’s throat with her  finger |
| 36 | Yue et al34. 2019 | 11/F | Unclear |
| 37 | Present Study 2019 (2 cases) | 18/M  17/F | Self inflicted wound on finger, mixed wih oil.  Self inflicted wound on finger, mixed wih oil. |

**References:**

1. Chapman JS. Peregrinating problem patients-Munchausen’s syndrome. JAMA 19.'57; 165:927-33
2. Barker JC. The syndrome of hospital addiction ( Munchausen syndrome): a report on the investigation of seven cases. J Ment Sci 1962; 108:167-82
3. Bowie EJW, Todd M, Thompson JH, Owen CA. Wright IS. Anticoagulant malingerers (the 'dicumarol-eaters') . Am J Med 1965; 39:855-64
4. Trew P, Anderson DE. Munchausen syndrome masquerading as pulmonary embolism. Med J Australia 1970; 41:637-41.
5. Carroll D. Obscure causes of hemoptysis. Md State Med J 1975;24:87-8.
6. Roethe RA. Fuller PB . Byrd RB, Stanford W, Fisk DE. Munchausen syndrome with pulmonary manifestations. Chest 1981; 79:487-88
7. Bush A, Collins JV (1982) Pulmonary Munchausen's syndrome. Postgrad Med J 58: 564-565.
8. Feinsilver SJ, Raffin TA, Kornei MC, Sullivan SJ, Smith MA. Factitious hemoptysis: the case of the red towel. Arch Intern Med 1983; 143:567-69
9. Raj B, Chawla RK. Fictitious haemoptysis. Indian J Chest Dis All Sci 198.'5; 27:190-92.
10. Mitchell D, Doyle P, Spiro S. Munchausen’s syndrome with multiple pulmonary manifestations. J R Soc Med 1985;78:681-2.
11. Humphries SR. Munchausen syndrome-motives and the relation to deliberate self-harm. Br J Psychiatry 1988; 152:416-17
12. Ifudu 0, Kioasinski SL, Friedman EA. Brief report: kidney related Munchausen's syndrome. N Engl J Med 1992; 327:388-89.
13. Duffy T. The Red Baron. N Engl J Med 1992;327:408-11.
14. Rusakow LS, Gershan WM, Bulto M, Szajnberg NM. Munchausen’s syndrome presenting as cystic fibrosis with hemoptysis. Pediatr Pulmonol 1993; 16: 326-9.
15. Baktari JB, Tashkin DP, Small GW (1994) Factitious hemoptysis. Adding to the differential diagnosis. Chest 105: 943-945
16. Okimoto N, Soejima R. Factitious hemoptysis and anemia. Chest 1994; 105:1629.
17. Ozden A, Canat S. Factitious hemoptysis. J Am Acad Child Adolesc Psychiatry 1999; 38:356-7.
18. Saed G, Potalivo S, Panzini L, Bisetti A. Munchausen´s syndrome: a Case of factitious hemoptysis. Paminerva Med 1999;41:6267.
19. Gurkan OU, Karacan O, Ozdemir O, Gonullin U,Numanoglu N, Alper D. Factitious haemoptysis. Aust N Z J Med 2000; 30:729.
20. Bjornson CL, Kirk VG. Munchausen´s syndrome presenting as hemoptysis in a 12-Year-Old Girl. Can Respir J. 2001;8:439-42
21. Highland KB, Flume PA. A “story” of a woman with cystic fibrosis. Chest 2002;121(5):1704-7.
22. Andrade TLES, Pireira-Silva JL. Factitious hemoptysis in Munchhausen syndrome: a differential diagnosis to be considered. J Bras Pneumol 2005; 31(2): 265-8.
23. Kokturk N, Ekim N, Aslan S, et al. A rare cause of hemoptysis: factitious disorder. South Med J 2006;99:186–7.
24. Kim YI, Chi SY, Ban HJ, Ju JY, Kwon YS, Oh IJ, Kim KS, Kim YI, Kim YC, Lim SC. A Case of Factitious Hemoptysis. Tuberc Respir Dis. 2008;65(5):396-399
25. Altınkaynak S, Ertekin V, Alp H, Fidan T. Munchausen's Syndrome. Eurasian J Med. 2009;41(2):126–128.
26. Yavuz ST,  Cinel G,  Ozcelik U,  Yalcin E,  Dogru D,  Kiper N. Munchausen syndrome by proxy presenting as unexplained hemoptysis: A report of two cases. European Respiratory Journal. 2012, 40 (Suppl 56) P3500;29
27. Cinel G,  Yavuz ST, Ozcelik U,  Yalcin E,  Dogru D,  Kiper N. A rare cause of hemoptysis: Munchausen syndrome. European Respiratory Journal Sep 2012, 40 (Suppl 56) P3510.
28. Alshimemeri A, Al-Johani M. Munchausen’s Syndrome with Factitious Hemoptysis Clinical Medicine and Diagnostics 2013, 3(5): 115-117
29. Smith JP, Serban KA, Bosslet GT (2013) Factitious Hemoptysis after Right Lower Lobectomy. Intern Med S12: 001. doi:10.4172/2165-8048. S12-001
30. Uzuner S, Bahali K, Kurban S, et al. A pediatric case of factitious disorder with unexplained bleeding symptoms. Gen Hosp Psychiatry 2013;35:679e7-8.
31. Mucha SM, Varghese LA, French RE, et al. Separating fact from factitious hemoptysis: a case report. Crit Care Nurse 2014;34:36–42.
32. Altıntaş E, Özşahin K. Munchausen Hemoptizi: Nadir Görülen Bir Yapay Bozukluk Çeşidi.TJFM&PC, 2016;10(3):175-178.
33. Demeritas MS, Gungor S, Ozgor B. A rare case of munchausen syndrome admitted with hemoptysis. J Turgut Ozal Med Cent. 2017;24(4):519-20.
34. Yue P, Zhou K, Hua Y, Fang J, Li Y. Approach to diagnosis of factitious disorder with unexplained hemoptysis: A case report. Medicine (Baltimore). 2019;98(6):e14152.
